# Supplementary material
Source: MDPI journal article supplement (https://www.mdpi.com/2073-4395/14/1/18)
Supplement: s1 [file s1]

## Supplementary Materials

### 1 Supplementary Tables

**Table S1** Basic physicochemical properties of the tested soil.

| Parameters          |             |
|---------------------|-------------|
| pH                  | 5.12 ± 0.17 |
| CEC (cmol(+)/kg)    | 18.4 ± 1.83 |
| Organic C (g/kg)    | 29.3 ± 2.59 |
| Total N (%)         | 0.98 ± 0.13 |
| Available P (mg/kg) | 38.2 ± 3.62 |
| Available K (mg/kg) | 90.0 ± 4.20 |
| Total Pb (mg/kg)    | 32.8 ± 0.43 |
| Total Zn (mg/kg)    | 90.3 ± 4.29 |
| Total Cd (mg/kg)    | 0.42 ± 0.01 |
| DTPA-Pb (mg/kg)     | 6.78 ± 0.91 |
| DTPA-Zn (mg/kg)     | 2.54 ± 0.13 |
| DTPA-Cd (mg/kg)     | 0.19 ± 0.02 |

All data were presented as means ± SE (standard error).

**Table S2** Two-way ANOVA of different indexes among different fertilization rates in two consecutive years.

| Factor                    | Years    |                     | Fertilizers |           | Years * Fertilizers |                     |
|---------------------------|----------|---------------------|-------------|-----------|---------------------|---------------------|
|                           | <i>F</i> | <i>P</i>            | <i>F</i>    | <i>P</i>  | <i>F</i>            | <i>P</i>            |
| Grain yield               | 35.1     | <0.001***           | 29.6        | <0.001*** | 6.94                | 0.001**             |
| Grain Cd concentration    | 53.1     | <0.001***           | 2056        | <0.001*** | 154                 | <0.001***           |
| Glume Cd concentration    | 338      | <0.001***           | 904         | <0.001*** | 1.32                | <0.001***           |
| Leaf Cd concentration     | 28.6     | <0.001***           | 83.8        | <0.001*** | 33.7                | <0.001***           |
| Shoot Cd concentration    | 19.8     | <0.001***           | 11.6        | <0.001*** | 1.15                | 0.367 <sup>ns</sup> |
| Root Cd concentration     | 471      | <0.001***           | 21.8        | <0.001*** | 21.7                | <0.001***           |
| TF <sub>stem/root</sub>   | 57.7     | <0.001***           | 11.5        | <0.001*** | 7.91                | 0.001**             |
| TF <sub>leaf/root</sub>   | 217      | <0.001***           | 55.3        | <0.001*** | 35.3                | <0.001***           |
| TF <sub>grain/root</sub>  | 245      | <0.001***           | 325         | <0.001*** | 47.8                | <0.001***           |
| TF <sub>grain/stem</sub>  | 14.8     | 0.001**             | 298         | <0.001*** | 23.9                | <0.001***           |
| TF <sub>grain/leaf</sub>  | 1.06     | 0.317 <sup>ns</sup> | 588         | <0.001*** | 39.3                | <0.001***           |
| TF <sub>grain/glume</sub> | 212      | <0.001***           | 641         | <0.001*** | 69.5                | <0.001***           |
| Grain Zn concentration    | 0.860    | 0.366 <sup>ns</sup> | 102         | <0.001*** | 2.63                | 0.069 <sup>ns</sup> |
| Grain Ca concentration    | 14.9     | 0.001**             | 186         | <0.001*** | 3.60                | 0.025*              |
| Grain Fe concentration    | 14.0     | 0.001**             | 93.9        | <0.001*** | 7.31                | 0.001**             |

|                              |       |                     |      |           |      |           |
|------------------------------|-------|---------------------|------|-----------|------|-----------|
| Grain Mn concentration       | 0.540 | 0.472 <sup>ns</sup> | 14.5 | <0.001*** | 4.40 | 0.012*    |
| Phytic acid content          | 0.061 | 0.807 <sup>ns</sup> | 15.9 | <0.001*** | 17.5 | <0.001*** |
| Total protein content        | 245   | <0.001***           | 18.5 | <0.001*** | 11.8 | <0.001*** |
| PA/Zn                        | 1.55  | 0.229 <sup>ns</sup> | 64.4 | <0.001*** | 13.2 | <0.001*** |
| Estimated Zn bioavailability | 0.051 | 0.824               | 44.2 | <0.001*** | 7.33 | 0.001**   |

---

Years and fertilizers are random factors. Number represents *F-values* (\*, \*\* and \*\*\*) significant at  $p < 0.05$ ,  $p < 0.01$  and  $p < 0.001$  levels, respectively. ns represents non-significance.
